# Supplementary material for: Genome-Wide Gene-Environment Study Identifies Glutamate Receptor Gene GRIN2A as a Parkinson's Disease Modifier Gene via Interaction with Coffee
Source: PubMed Central journal article supplement (PMC3158052; doi:10.1371/journal.pgen.1002237), 2011-08-18

**A** | chr16 (p13.2) | p13.3 13.1 | 12.3 p12.1 16p11.2 | q11.2q12.1 | 13 16q21 22.1 | q23.1

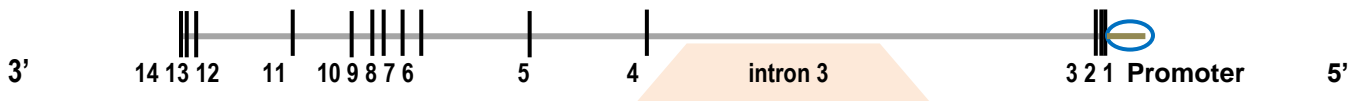

9,705,140 9,754,766 Base pair position 10,184,112 10,234,830

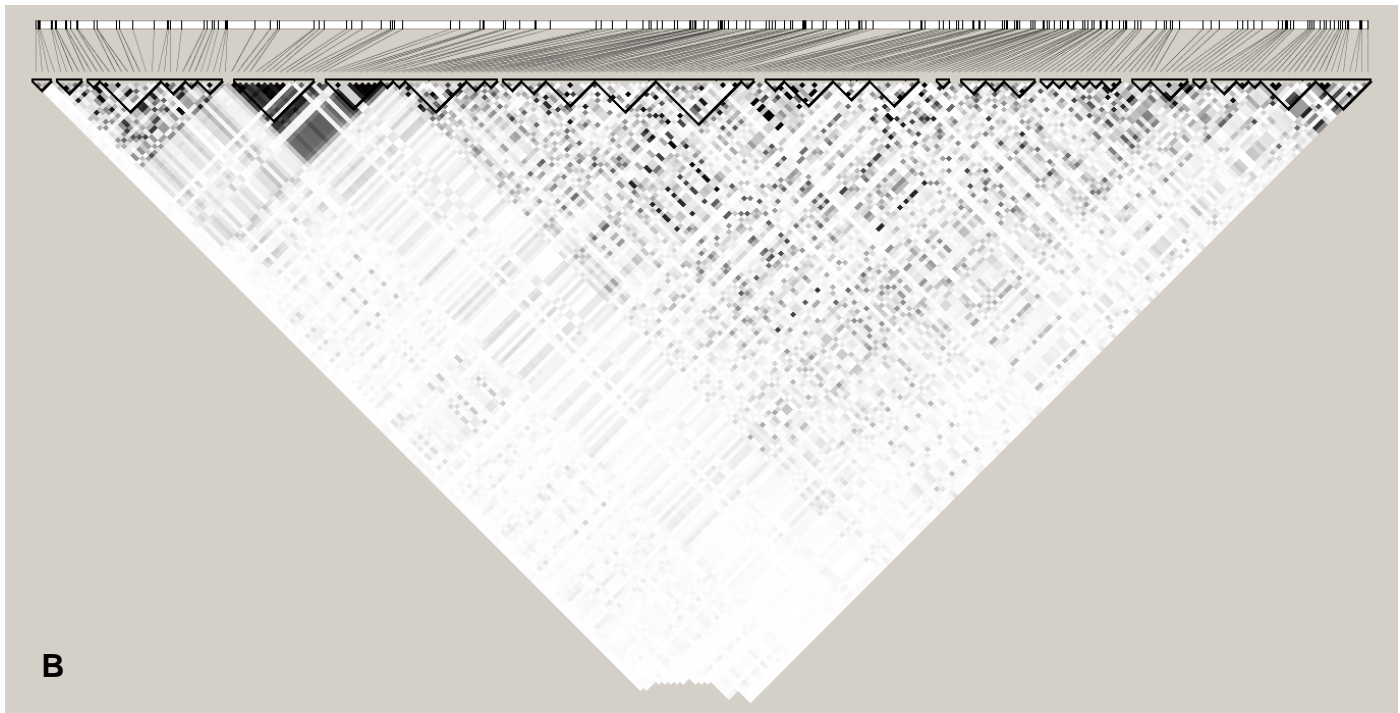

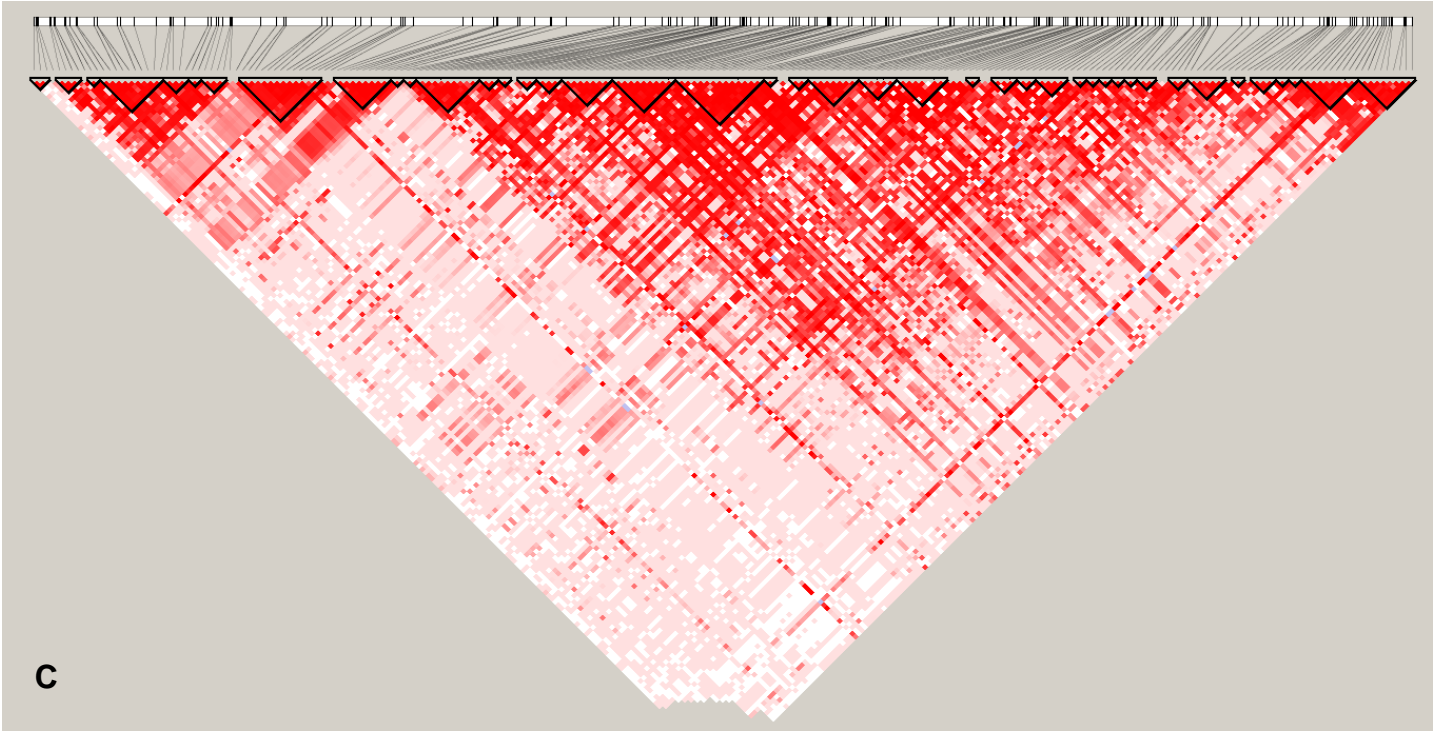

Supplement: pgen.1002237.s002.pdf [file pgen.1002237.s002.pdf]
