# Supplementary material for: Genome-Wide Gene-Environment Study Identifies Glutamate Receptor Gene GRIN2A as a Parkinson's Disease Modifier Gene via Interaction with Coffee
Source: PubMed Central journal article supplement (PMC3158052; doi:10.1371/journal.pgen.1002237), 2011-08-18

**A**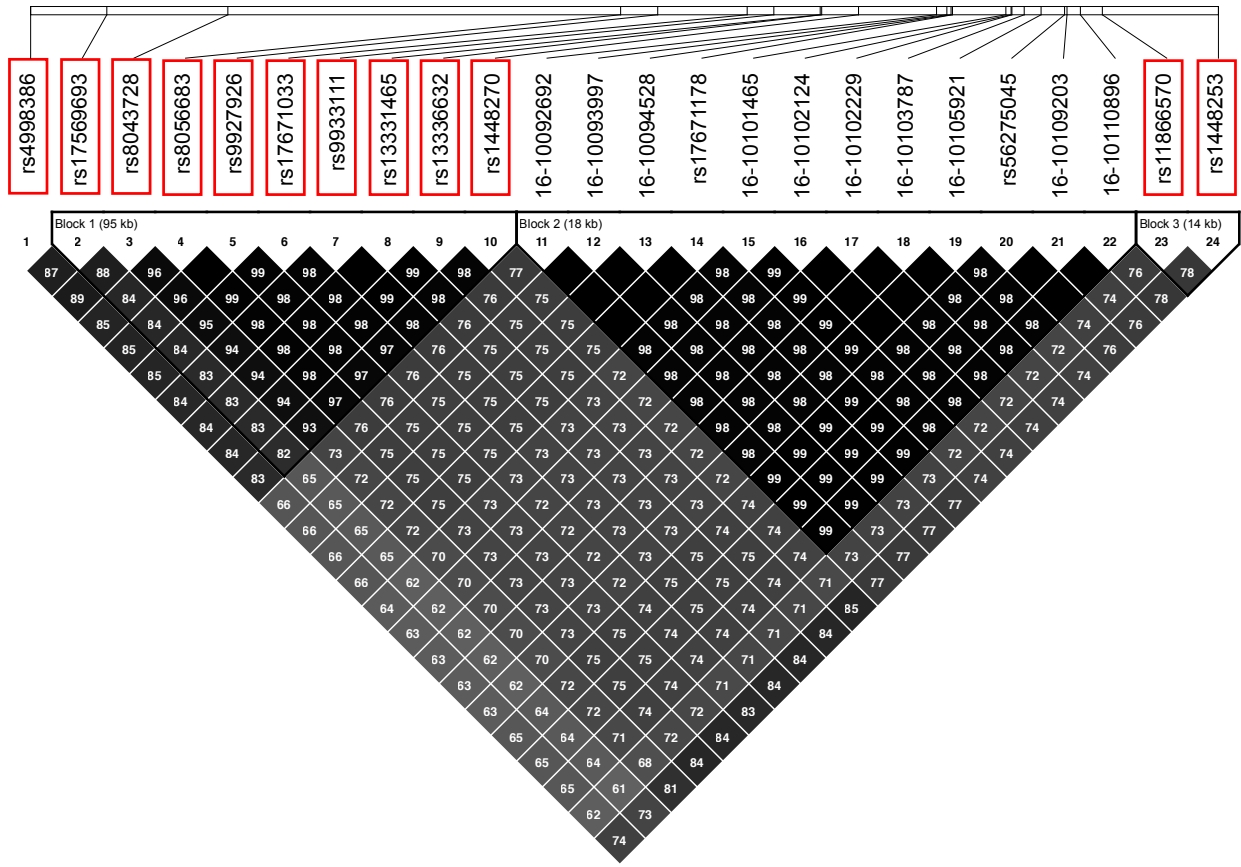**B**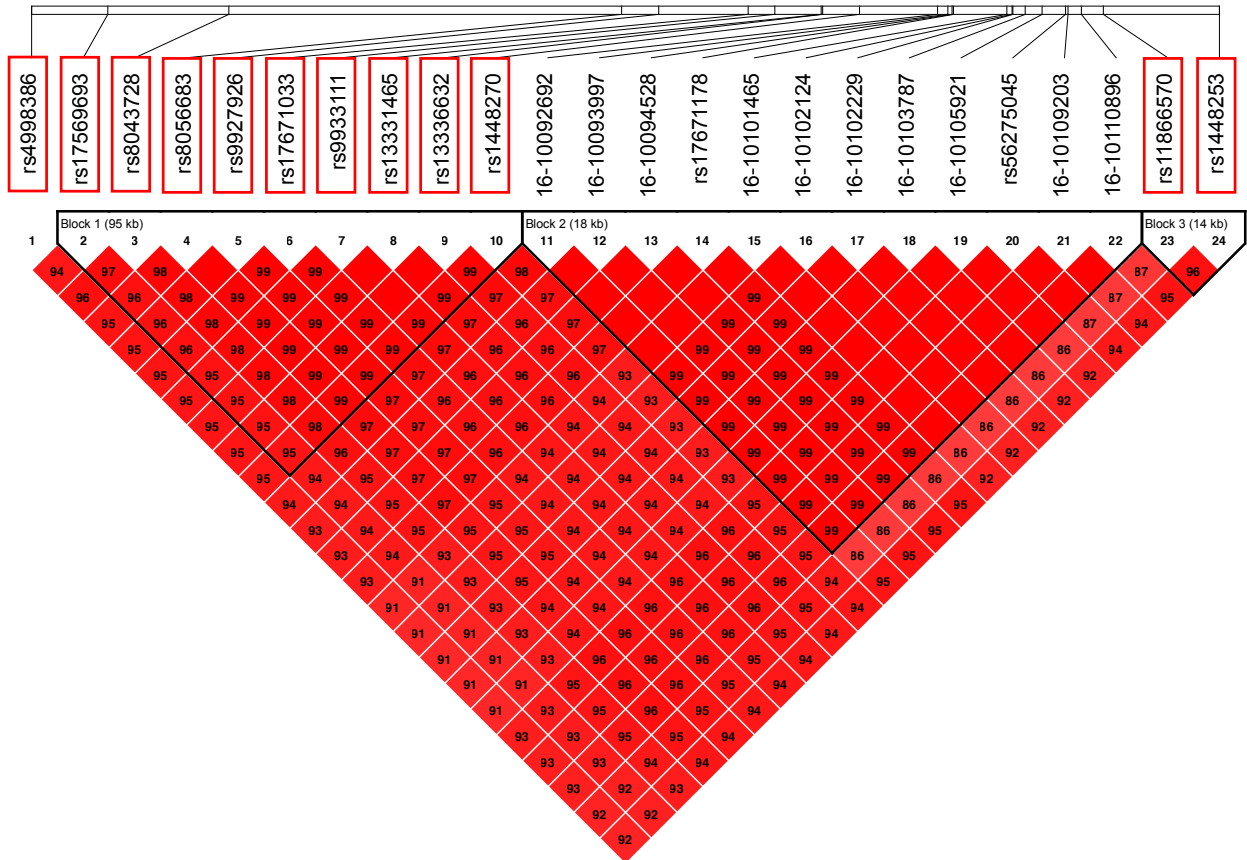

Supplement: pgen.1002237.s003.pdf [file pgen.1002237.s003.pdf]
